# Supplementary material for: Acetylacetone-modified ubiquitin C-terminus enables specific capture of sulfenylated deubiquitinases
Source: Royal Society of Chemistry journal article supplement (doi:10.1039/d5cc05543a), 2025-12-15
Supplement: d5cc05543a1.pdf [file d5cc05543a1.pdf]

## Supplementary Information

### Acetylacetone-Modified Ubiquitin C-Terminus Enables Specific Capture of Sulfenylated Deubiquitinases

Liwen Liu<sup>‡a</sup>, Pincheng Li<sup>‡a</sup>, Shuo Yang<sup>a</sup>, Dingfei Yan<sup>b</sup>, Beichen Wang<sup>a</sup>, Yi-Ming Li<sup>\*a</sup> and Yu Wang<sup>\*a</sup>

<sup>a</sup> School of Food and Biological Engineering, Engineering Research Center of Bio-process, Ministry of Education, Key Laboratory of Animal Source of Anhui Province, Hefei University of Technology, Hefei 230009, China. E-mail: [yuwang@hfut.edu.cn](mailto:yuwang@hfut.edu.cn); [ymli@hfut.edu.cn](mailto:ymli@hfut.edu.cn)

<sup>b</sup> Center of Protein Analysis Technology, Tsinghua University

\* Corresponding authors

‡ These authors contributed equally to this work.

---

## Table of Contents

|                                                                                                                  |           |
|------------------------------------------------------------------------------------------------------------------|-----------|
| <b>1. General Information .....</b>                                                                              | <b>3</b>  |
| <b>1.1 Reagents and materials.....</b>                                                                           | <b>3</b>  |
| <b>1.2 RP-HPLC, FPLC and MS.....</b>                                                                             | <b>4</b>  |
| <b>1.3 Immunoblotting and Antibodies.....</b>                                                                    | <b>4</b>  |
| <b>2. Protein expression and purification .....</b>                                                              | <b>4</b>  |
| <b>2.1 Protein Sequence:.....</b>                                                                                | <b>4</b>  |
| <b>2.2 Expression and purification of DUBs.....</b>                                                              | <b>6</b>  |
| <b>2.3 Expression and purification of UbG75C .....</b>                                                           | <b>6</b>  |
| <b>3. General procedures for the preparation of Probe 1, Probe 2 and Ub-DYn-2.....</b>                           | <b>6</b>  |
| <b>3.1 General procedure for the preparation of the acetylacetone derivative.....</b>                            | <b>7</b>  |
| <b>3.2 General procedure for the preparation of Ub-DYn-2. ....</b>                                               | <b>7</b>  |
| <b>3.3 General procedure for the preparation of Ub(1-74)-NHNH<sub>2</sub> .....</b>                              | <b>7</b>  |
| <b>3.4 General procedure for the preparation of Biotin-Ub(1-74)-NHNH<sub>2</sub> .....</b>                       | <b>7</b>  |
| <b>3.5 The ligation between b and cysteamine was achieved via hydrazide-based native chemical ligation. ....</b> | <b>7</b>  |
| <b>3.6 The ligation between d and cysteamine was achieved via hydrazide-based native chemical ligation. ....</b> | <b>8</b>  |
| <b>4 Labeling of DUBs .....</b>                                                                                  | <b>9</b>  |
| <b>4.4 Labeling of OTUB1 S-sulfenylation using Probe 1 in Vitro. ....</b>                                        | <b>9</b>  |
| <b>4.5 Labeling of A20 or USP7-CD S-sulfenylation using Probe 1 in Vitro. ....</b>                               | <b>9</b>  |
| <b>4.6 Labeling of S-Sulfenylated USP7-CD with Probe 1 and Ub-DYn-2 in Vitro ..</b>                              | <b>9</b>  |
| <b>4.7 Labeling of OTUB1 C91A or A20 C103A using Probe 1 in Vitro.....</b>                                       | <b>9</b>  |
| <b>4.8 Labeling of OTUB1 in cell lysate.....</b>                                                                 | <b>9</b>  |
| <b>4.9 Immunoblotting analysis .....</b>                                                                         | <b>10</b> |
| <b>5 Supplementary figures.....</b>                                                                              | <b>10</b> |
| <b>6. Original SDS-PAGE analysis data .....</b>                                                                  | <b>11</b> |
| <b>7. Original Western Blots analysis data .....</b>                                                             | <b>12</b> |
| <b>8 References .....</b>                                                                                        | <b>13</b> |

---

# 1. General Information

## 1.1 Reagents and materials

| Reagents                                                                   | Company                                           |
|----------------------------------------------------------------------------|---------------------------------------------------|
| Perchloric acid( $\text{HClO}_4$ )                                         | J&K Scientific Ltd (Beijing)                      |
| Guanidine hydrochloride ( $\text{Gn} \cdot \text{HCl}$ )                   | Adamas-beta (Shanghai, China)                     |
| $\text{NaH}_2\text{PO}_4 \cdot 12\text{H}_2\text{O}$                       | Ouhe Technology Ltd (Beijing)                     |
| $\text{Na}_2\text{HPO}_4 \cdot 12\text{H}_2\text{O}$                       | Ouhe Technology Ltd (Beijing)                     |
| 4-mercaptophenylacetic acid (MPAA)                                         | Alfa Aesar (China) Chemical Co., Ltd              |
| Sodium nitrite ( $\text{NaNO}_2$ )                                         | Beijing Chemical Works Co., Ltd (Beijing)         |
| Tris (2-carboxyethyl) phosphine hydrochloride (TCEP $\cdot$ $\text{HCl}$ ) | Adamas-beta, Titan Scientific Co., Ltd (Shanghai) |
| $\text{NaOH}$ , $\text{NaCl}$ , $\text{HCl}$                               | Sinopharm Chemical Reagent Co., Ltd (Shanghai)    |
| Tris (hydroxymethyl) aminomethane (Tris)                                   | Titan Scientific Co., Ltd (Shanghai)              |
| Sodium 2-mercaptoethanesulfonate (MesNa)                                   | Adamas-beta, Titan Scientific Co., Ltd (Shanghai) |
| hydrazine dihydrochloride                                                  | J&K Scientific Ltd (Beijing)                      |
| HEPES, sodium salt                                                         | Titan Scientific Co., Ltd (Shanghai)              |
| D/L-methionine                                                             | GL Bio chem (Shanghai) Ltd (Shanghai, China)      |
| Yeast extract, Tryptone, Kanamycin                                         | Sigma-Aldrich                                     |
| Isopropyl-Dthiogalactopyranoside (IPTG)                                    | Energy Chemical                                   |
| Chemically competent BL21 (DE3) cells                                      | TransGen Biotech ltd (Beijing)                    |
| Anti-OTUB1 (ab175200)                                                      | Abcam                                             |
| Anti- $\beta$ -Actin antibody (4970)                                       | Cell Signaling Technology                         |
| Anti-His6 antibody (D191001)                                               | Sangon Biotech.                                   |
| goat anti mouse IgG (HRP) antibody (D110087)                               | Sangon Biotech.                                   |
| goat anti rabbit IgG (HRP) antibody                                        | Sangon Biotech.                                   |

## 1.2 RP-HPLC, FPLC and MS

The SHIMADZU Prominence HPLC system was utilized for the analysis and purification of peptides and proteins. Analytical separation was performed on Welch XB-C18 ( $4.6 \times 250$  mm,  $5 \mu\text{m}$ ,  $120 \text{ \AA}$ ) and XB-C4 ( $4.6 \times 250$  mm,  $5 \mu\text{m}$ ,  $300 \text{ \AA}$ ) columns at  $1.0 \text{ mL min}^{-1}$ ; Semi-preparative chromatography was performed on Welch XB-C4 ( $250 \times 10$  mm,  $5 \mu\text{m}$ ,  $300 \text{ \AA}$ ) and XB-C18 ( $250 \times 10$  mm,  $5 \mu\text{m}$ ,  $120 \text{ \AA}$ ) columns at  $4.0 \text{ mL min}^{-1}$ ; UV detection was carried out at 214 and 254 nm for both stages, employing a binary solvent system of 0.08 % TFA in acetonitrile (A) and 0.1 % TFA in water (B). Purification by FPLC was conducted on a Cytiva AKTA purifier system, with UV absorbance followed at 280 nm. ESI-MS were acquired on a Shimadzu LC/MS-2020 platform, while proteomic profiling was carried out with a Bruker nano-Elute 2–timsTOF Pro 2 configuration.

## 1.3 Immunoblotting and Antibodies

Following SDS-PAGE, proteins were electro-transferred to PVDF membranes, blocked with 5 % skim milk in TBS ( $4^\circ\text{C}$ , 12 h), and sequentially probed with primary ( $37^\circ\text{C}$ , 2 h) and HRP-conjugated secondary ( $37^\circ\text{C}$ , 2 h) antibodies.

## 2. Protein expression and purification

### 2.1 Protein Sequence:

**UbG75C:** The G75C point mutation in Ub75C was cloned into pET-22b vector by site-directed mutagenesis kit (Takara).

#### Amino acid sequence:

MQIFVKTLTGKTITLEVEPSDTIENVKAKIQDKEGIPPDQQRLIFAGKQLEDGRTL  
SDYNIQKESTLHLVLRRLRC

**OTUB1:** OTUB1 gene was codon optimized and synthesized by Genscript (Nanjing) and cloned into pET-28a vector with *NdeI* and *XhoI* as restriction site.

#### Amino Acid sequence:

MAAEEPQQKQEPLGSDSEGVNCLAYDEAIMAQQDRIQQEIAVQNPLVSERL

ELSVLYKEYAEDDNIYQQKIKDLHKKYSYIRKTRPDGNCFYRAFGFSHLEALLD  
DSKELQRFKAVSAKSKEDLVSQGFTEFTIEDFHNTFMDLIEQVEKQTSVADLLAS  
FNDQSTSDYLVVYLRLLTSGYLQRESKFFEHFIEGGRTVKEFCQQEVEPMCKESD  
HIHIIALAQALSVSIIQVEYMDRGEGETTNPHIFPEGSEPKVYLLYRPGHYDILYK

**USP7CD:** USP7 catalytic domain (208-560) gene was codon optimized and synthesized by Genscript (Nanjing) and cloned into pET-28a vector with *NdeI* and *XhoI* as restriction site.

**Amino Acid sequence:**

KKHTGYVGLKNQGATCYMNSLLQTLFFTNQLRKAVYMMPTGDDSSKSVPL  
ALQRVFYELQHSDKPVGTKKLTKSFGWETLDSFMQHDTVQELCRVLLDNVENM  
KGTCVEGTIPKLFRGKMVSIIQCKEVDYRSDRREDYYDIQLSIKGKKNIFESFVD  
YVAVEQLDGDNKYDAGEHGLQEAEGVKFLTLPPVLHLQLMRFMYDPQTDQN  
IKINDRFEFPEQLPLDEFLQKTDPKDPANYILHAVLVHSGDNHGGHYVVYLNPK  
GDGKWCKFDDDDVSRCTKEEAIEHNYGGHDDDLVSRHCTNAYMLVYIRESKLS  
EVLQAVTDHDIPQQLVERLQEEKRIEAQKRKERQE

**A20:** A20 gene was codon optimized and synthesized by Genscript (Nanjing) and cloned into pET-28a vector with *NdeI* and *XhoI* as restriction site.

**Amino Acid sequence:**

MAEQVLPQALYLSNMRKAVKIRERTPEDIFKPTNGIIHHFKTMHRYTLEMERT  
CQFCPQFREIIHKALIDRNIQATLESQKKLNWCREVRLVALKTNGDGNCLMHA  
TSQYMWGVQDSDLVLRKALFSTLKETDTRNFKFRWQLESLKSQEFVETGLCYD  
TRNWNDEWDNLIKMASTDTPMARSLQYNSLEEIHIFVLCNILRRPIIVISDKMLR  
SLESGSNFAPLKVGGIYLPLHWPAAQECYRYPIVLGYDSHHFVPLVTLKDSGPEIR  
AVPLVNRDRGRFEDLKVHFLTPENEMKEKLLKEYLMVIEIPVQGWHDHGTTHLI  
NAAKLDEANLPKEINLVDDYFELVQHEYKKWQENSEQGRRE

**OTUB1 C91A:** OTUB1 C91A gene was codon optimized and synthesized by Genscript (Nanjing) and cloned into pET-28a vector with *NdeI* and *XhoI* as restriction site.

**Amino Acid sequence:**

MAAEPPQQKQEPLGSDSEGVNCLAYDEAIMAQQDRIQQEIAVQNPLVSERL  
ELSVLYKEYAEDDNIYQQKIKDLHKKYSYIRKTRPDGNCFYRAFGFSHLEALLD

DSKELQRFKAVSAKSKEDLVSQGFTEFTIEDFHNTFMDLIEQVEKQTSVADLLAS  
FNDQSTSDYLVVYLRLLTSGYLQRESKFFEHFIEGGRTVKEFCQQEVEPMCKESD  
HIHIALAQALSVSIIQVEYMDRGEGGTTNPHIFPEGSEPKVYLLYRPGHYDILYK

**A20 C103A:** A20 C103A gene was codon optimized and synthesized by Genscript (Nanjing) and cloned into pET-28a vector with *NdeI* and *XhoI* as restriction site.

**Amino Acid sequence:**

MAEQVLPQALYLSNMRKAVKIRERTPEDIFKPTNGIIHHFKTMHRYTLEMERT  
CQFCPQFREIIHKALIDRNIQATLESQKKLNWCREVRKLVALKTNGDGNALMHA  
TSQYMWGVQDSDLVLRKALFSTLKETDTRNFKFRWQLESLSQEFVETGLCYD  
TRNWNDEWDNLIKMASTDTPMARSGLQYNSLEEIHIFVLCNILRRPIIVISDKMLR  
SLESGSNFAPLKVGGIYLPLHWPAAQECYRYPIVLGYDSHHFVPLVTLKDSGPEIR  
AVPLVNRDRGRFEDLKVHFLTDPENEMKEKLLKEYLMVIEIPVQGDHGTTHLI  
NAAKLDEANLPKEINLVDDYFELVQHEYKKWQENSEQGRRE

## **2.2 Expression and purification of DUBs.**

OTUB1, A20, OTUB1C91A, A20C103A plasmids were transformed into *E. coli* BL21(DE3), and cultures were grown at 37 °C in LB–kanamycin (0.1 mg mL<sup>-1</sup>) to OD<sub>600</sub> ≈ 0.8. Expression was induced with 0.4 mM IPTG at 20 °C for 8 h. Cells were harvested, resuspended in ice-cold lysis buffer A (50 mM Tris, 100 mM NaCl, pH 7.5), and lysed by sonication on ice. The clarified lysate was batch-bound to Ni-NTA resin (4 °C, 2 h), washed with lysis buffer B (20 mM Tris, 150 mM NaCl, 40 mM imidazole, pH 7.5), and eluted with the same buffer containing 250 mM imidazole. Final purification was achieved by FPLC on a Superdex 75 10/300 GL column.

## **2.3 Expression and purification of UbG75C.**

UbG75C was introduced into *E. coli* BL21(DE3) for expression. The culture was grown at 37 °C in LB–Ampicillin (0.1 mg mL<sup>-1</sup>) to OD<sub>600</sub> ≈ 0.8. Expression was induced with 0.4 mM IPTG at 37 °C for 5 h. Cells were harvested, resuspended in ice-cold lysis buffer (25 mM Tris, 150 mM NaCl, pH 7.5), and lysed by sonication on ice. After adjusting to 1 % (v/v) perchloric acid under vigorous agitation, the sample was clarified by centrifugation and dialyzed against 0.1 % aqueous TFA to remove perchloric acid.

## **3. General procedures for the preparation of Probe 1, Probe 2 and Ub-DYn-2**

---

### **3.1 General procedure for the preparation of the acetylacetone derivative.**

The details for the preparation of the acetylacetone derivative (1-bromo-2,4-pentanedione) were described in the ref. Tetrahedron Lett. 2007, 48, 3767–3769.<sup>1</sup>

### **3.2 General procedure for the preparation of Ub-DYn-2.**

The synthetic protocol for Ub-DYn-2 was essentially as described.<sup>4</sup>

### **3.3 General procedure for the preparation of Ub(1-74)-NHNH<sub>2</sub>.**

The synthetic protocol for Ub(1-74)-NHNH<sub>2</sub> (**b**) was essentially as described.<sup>2</sup> In detail, the Ub mutant UbG75C was first concentrated to 10 mg/mL. Following this step, a hydrazinolysis reagent containing MesNa (100 mg/mL), NH<sub>2</sub>NH<sub>2</sub>·HCl (50 mg/mL), and tri(2-carboxyethyl)phosphine (TCEP, 5 mg/mL) was added.<sup>2</sup> After adjusting the reaction pH to 7.0, the reaction proceeded at 50 °C for 48 h with N<sub>2</sub> as the protective gas. Separation of the reaction mixture was achieved by means of semi-preparative HPLC (C18 column), with a gradient elution of 20%-70% A applied for 30 min (isolated yield 41%).

### **3.4 General procedure for the preparation of Biotin-Ub(1-74)-NHNH<sub>2</sub>.**

The preparation of the 2-Cl-(Trt)-NHNH<sub>2</sub> resin was performed essentially as described previously.<sup>3</sup> Fmoc-based solid-phase peptide synthesis was conducted following a previously described protocol, with detailed procedures for chemical protein synthesis provided in the Supporting Information (SI, Page 4)<sup>1</sup>. It should be noted that we used two dipeptide analogues (pseudoproline dipeptide Leu56-Ser57 and dimethoxybenzyl Asp52-Gly53) to improve the synthesis efficiency. Notably, two dipeptide analogues—specifically the pseudoproline dipeptide Leu56-Ser57 and dimethoxybenzyl-modified Asp52-Gly53—were employed to enhance the efficiency of the synthetic process. Peptides were cleaved from the resin support via a standard trifluoroacetic acid (TFA)-based cleavage cocktail (TFA:phenol:H<sub>2</sub>O:thioanisole:1,2-ethanedithiol (EDT) = 82.5:5:5:5:2.5, 2-3 mL per 100 mg resin) for a duration of 3 hours.

### **3.5 The ligation between **b** and cysteamine was achieved via hydrazide-based native chemical ligation.**

8.4 mg of **b** (1 μmol, 1 equiv.) was dissolved in ligation buffer (0.2 M PBS, 6 M Gn-HCl, pH 3.0), followed by addition of NaNO<sub>2</sub> (0.48 mg, 7 equiv.). The reaction mixture was incubated at -10 °C for 20 min to convert the peptide **b** to the corresponding acyl azide. Next, 4-mercaptophenylacetic (MPAA, 10.1 mg, 60.0 equiv.)<sup>2</sup> and cysteamine (0.39 mg, 5.0 equiv.) were added to the above solution, and the mixture was then stirred at pH 6.5 and

37 °C for 3 h to obtain **c**. Finally, separation of the reaction mixture was achieved by means of semi-preparative HPLC (C18 column), with a gradient elution of 20%-70% A applied for 30 min (isolated yield 37%).

### **3.6 The ligation between **d** and cysteamine was achieved via hydrazide-based native chemical ligation.**

Like above, 8.9 mg of **d** (1  $\mu$ mol, 1 equiv.) was dissolved in ligation buffer (0.2 M PBS, 6 M Gn-HCl, pH 3.0), followed by addition of NaNO<sub>2</sub> (0.48 mg, 7 equiv.). The reaction mixture was incubated at -10 °C for 20 min to convert the peptide **d** to the corresponding acyl azide. Next, 4-mercaptophenylacetic (MPAA, 10.1 mg, 60.0 equiv.)<sup>2</sup> and cysteamine (0.39 mg, 5.0 equiv.) were added to the above solution, and the mixture was then stirred at pH 6.5 and 37 °C for 3 h to obtain **e**. Finally, separation of the reaction mixture was achieved by means of semi-preparative HPLC (C18 column), with a gradient elution of 20%-70% A applied for 30 min (isolated yield 32%).

### **3.7 The ligation between **c** and acetylacetone derivative was achieved via cysteine-aminoethylation.**

8.5 mg of **c** (1  $\mu$ mol, 1 equiv.) was dissolved in HEPES buffer (6 M Gn-HCl, 0.5 M HEPES, 10 mM D/L-methionine, 10 mM TCEP, pH 8.5), after which the acetylacetone derivative (4.8 mg, 25 equiv.) was added and the mixture was stirred 37 °C for 4 h to obtain **Probe 1**. Finally, separation of the reaction mixture was achieved by means of semi-preparative HPLC (C18 column), with a gradient elution of 20%-70% A applied for 30 min (isolated yield 23%).

### **3.8 The ligation between **e** and acetylacetone derivative was achieved via cysteine-aminoethylation.**

9.0 mg of **e** (1  $\mu$ mol, 1 equiv.) was dissolved in HEPES buffer (6 M Gn-HCl, 0.5 M HEPES, 10 mM D/L-methionine, 10 mM TCEP, pH 8.5), after which the acetylacetone derivative (4.8mg, 25 equiv.) was added and the mixture was stirred 37 °C for 4 h to obtain **Probe 2**. Finally, separation of the reaction mixture was achieved by means of semi-preparative HPLC (C18 column), with a gradient elution of 20%-70% A applied for 30 min (isolated yield 36%).

### **3.9 Probes refolding**

Briefly, 1 mg of the probe was solubilized in 1 mL of refolding buffer (6 M Gn-HCl, 0.2 M Na<sub>2</sub>HPO<sub>4</sub>, pH 7.0). The resulting solution was subsequently subjected to four rounds of



---

buffer exchange into Tris buffer (20 mM Tris-base, 150 mM NaCl, pH 7.0) at 4 °C, with each exchange step lasting 4 hours and yielding an overall recovery of 82%.

## **4 Labeling of DUBs**

### **4.4 Labeling of OTUB1 S-sulfenylation using Probe 1 in Vitro.**

To evaluate the effect of H<sub>2</sub>O<sub>2</sub> concentration on the efficiency of probe 1 labelling OTUB1, 3 μM OTUB1 and 5 μM **Probe 1** were incubated at 37 °C in labeling buffer (50 mM Tris-HCl, 100 mM NaCl, pH 7.5) for 30 min with H<sub>2</sub>O<sub>2</sub> of different concentrations (1-1000 μM). To evaluate the kinetics of OTUB1 labeling by **Probe 1**, 3 μM OTUB1 was incubated with 5 μM **Probe 1** at 37 °C in labeling buffer (50 mM Tris-HCl, 100 mM NaCl, pH 7.5) supplemented with 10 μM H<sub>2</sub>O<sub>2</sub> for 5, 10, 20, 30, 60, and 120 min. All samples were analyzed by SDS-PAGE.

### **4.5 Labeling of A20 or USP7-CD S-sulfenylation using Probe 1 in Vitro.**

A20 or USP7-CD cross-linked with **Probe 1** under the same conditions as above. 3 μM A20 or USP7-CD and 5 μM **Probe 1** were incubated at 37 °C in labeling buffer (50 mM Tris-HCl, 100 mM NaCl, pH 7.5) for 30 min with 10 μM H<sub>2</sub>O<sub>2</sub>. All samples were analyzed by SDS-PAGE.

### **4.6 Labeling of S-Sulfenylated USP7-CD with Probe 1 and Ub-DYn-2 in Vitro**

To compare the labeling efficiency of Ub-DYn-2 and **Probe 1**. 3 μM USP7-CD and 5 μM **Probe 1** or Ub-DYn-2 were incubated at 37 °C in labeling buffer (50 mM Tris-HCl, 100 mM NaCl, pH 7.5) with 10 μM H<sub>2</sub>O<sub>2</sub> for 2min, 5min, 10min, 15min. All samples were analyzed by SDS-PAGE.

### **4.7 Labeling of OTUB1 C91A or A20 C103A using Probe 1 in Vitro.**

OTUB1 C91A or A20 C103A cross-linked with **Probe 1** under the same conditions as above. 3 μM OTUB1 C91A or A20 C103A and 5 μM **Probe 1** were incubated at 37 °C in labeling buffer (50 mM Tris-HCl, 100 mM NaCl, pH 7.5) for 30 min with 10 μM H<sub>2</sub>O<sub>2</sub>. All samples were analyzed by SDS-PAGE.

### **4.8 Labeling of OTUB1 in cell lysate.**

To assess the efficiency of OTUB1 S-sulfenylation cross-linking to **Probe 1** under physiologically complex conditions. 3 μM OTUB1 and 5 μM **Probe 1** were added to 100μg of Hela cell lysate and incubated at 37°C for 30min. The samples were treated with 10 μM

H<sub>2</sub>O<sub>2</sub>, with untreated samples serving as negative controls. Immunoblotting analysis was performed using an anti-His<sub>6</sub> antibody. Subsequently, To assess whether **Probe 1** can selectively label endogenous OTUB1 S-sulfenylation, like above, 5  $\mu$ M **Probe 1** was added to 100 $\mu$ g of Hela cell lysate and incubated at 37°C for 30min, The samples were treated with 10  $\mu$ M H<sub>2</sub>O<sub>2</sub>, with untreated samples serving as negative controls. Immunoblotting analysis was performed using an anti-OTUB1 antibody.

#### 4.9 Immunoblotting analysis

Briefly, 5  $\mu$ M **Probe 2** was added to 100  $\mu$ g HeLa cell lysate and incubated at 37°C for 30min. The samples were treated with 10  $\mu$ M H<sub>2</sub>O<sub>2</sub>, with untreated samples serving as negative controls. Immunoblotting analysis was performed using an anti-Biotin antibody.

## 5 Supplementary figures

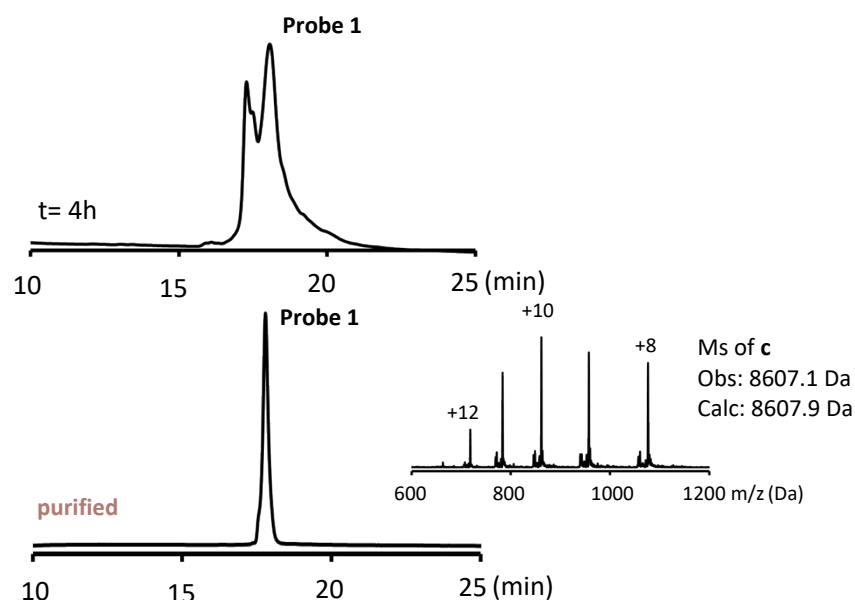

Figure S1. RP-HPLC and ESI-MS of Probe 1.

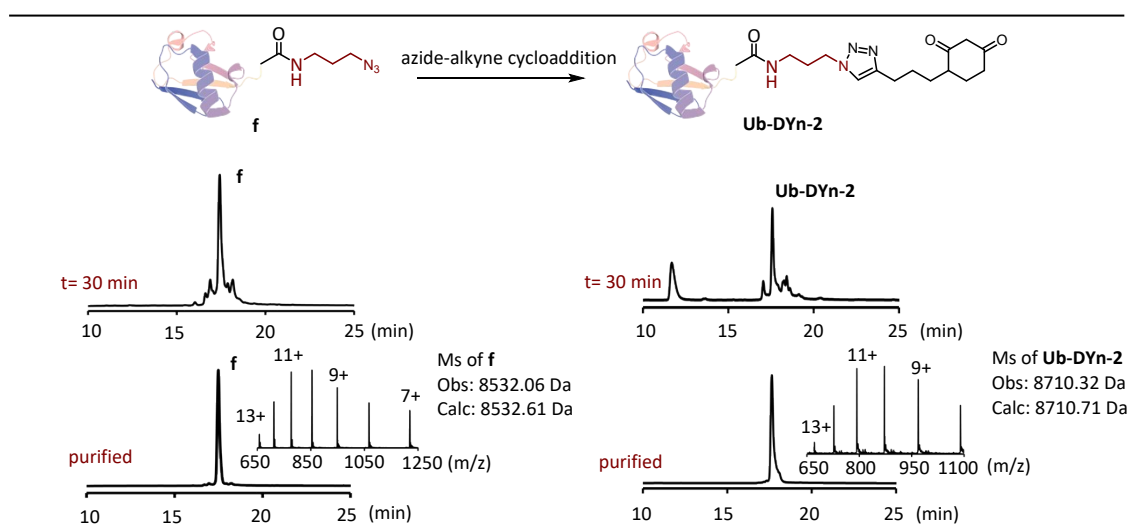

Figure S2. Chemical synthesis and characterization of **Ub-DYn-2**.

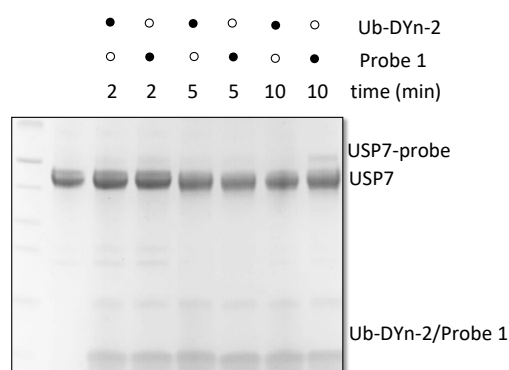

Figure S3. Comparison of Labeling Efficiency Between **Ub-DYn-2** and **Probe 1** for S-Sulfenylated USP7-CD.

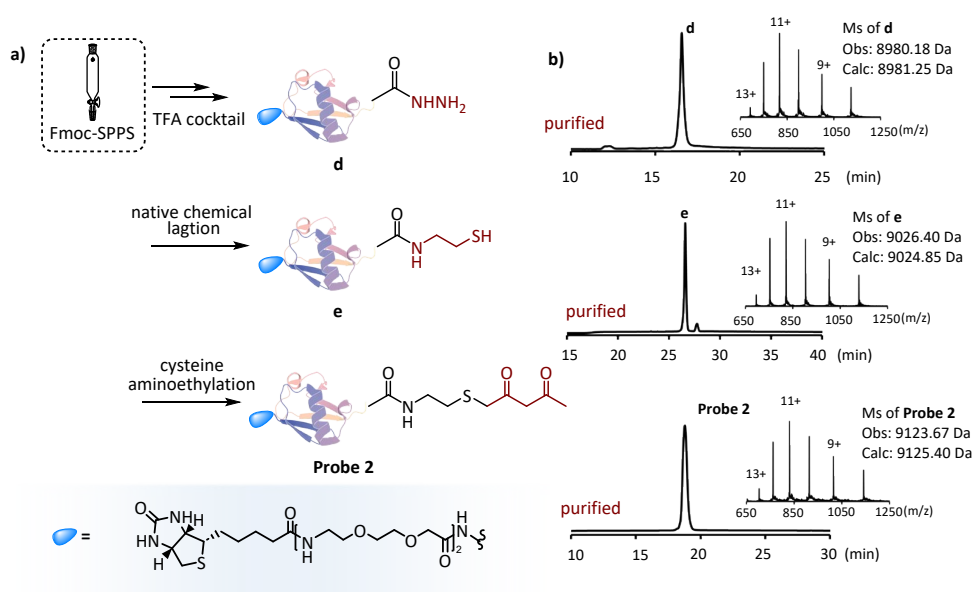

Figure S4. a) Chemical synthesis and characterization of acetylacetone-modified Biotin-Ub probe (**Probe 2**). a) **Synthetic route of Probe 2**. b) RP-HPLC and ESI-MS of d, e and **Probe 2**.

## 6. Original SDS-PAGE analysis data

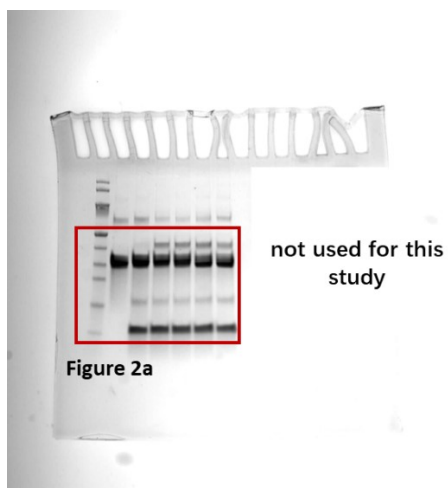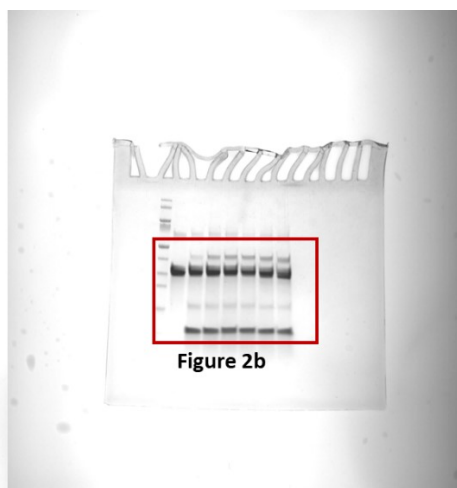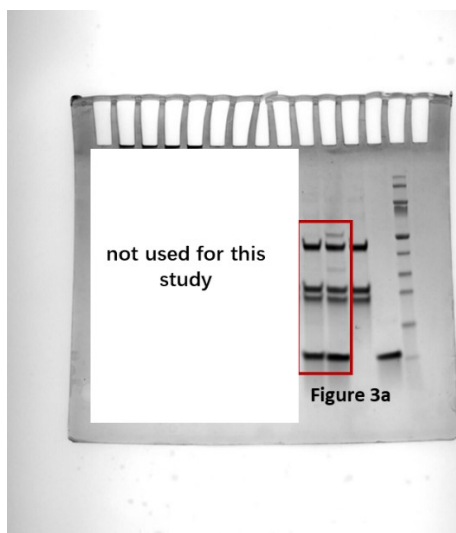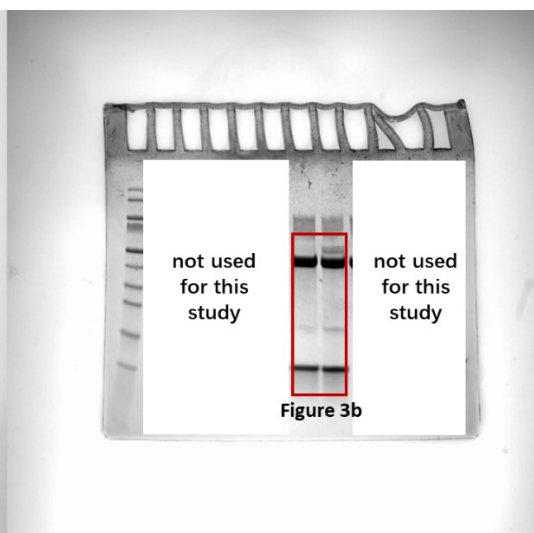

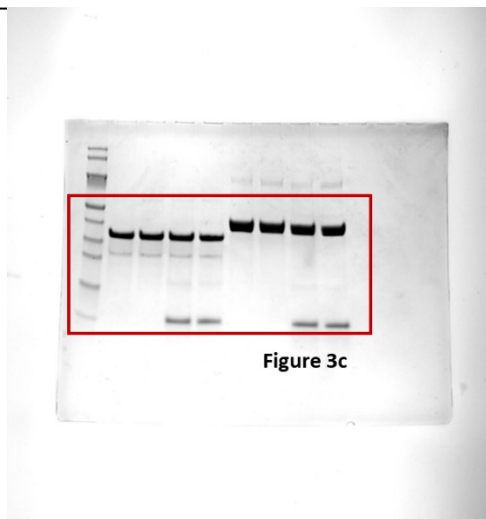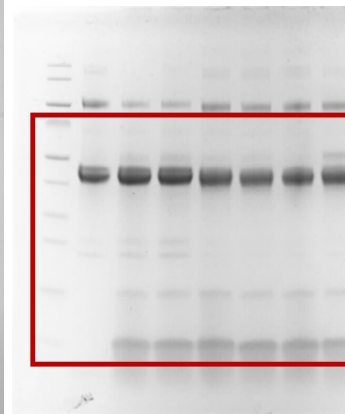

## 7. Original Western Blots analysis data

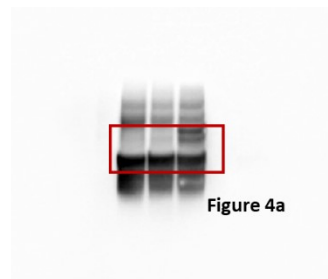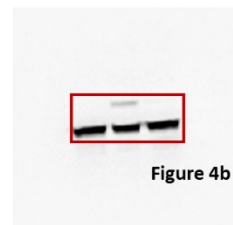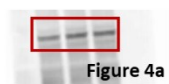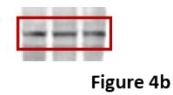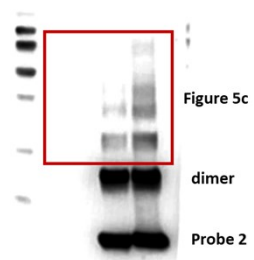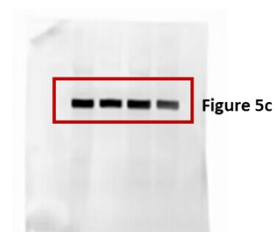

## 8 References

---

(1) Shamshina, J. L.; Snowden, T. S. Convergent synthesis of potent COX-2 inhibitor inotilone. *Tetrahedron Lett.* **2007**, 48 (22), 3767-3769.

(2) (a) Wang, Y.; Xia, Q.; Hua, X.; Guo, Y.; Shi, J.; Li, Y.-M. Semi-synthesis of biotin-bearing activity-based ubiquitin probes through sequential enzymatic ligation, N-S acyl transfer and aminolysis reaction. *Chin. Chem. Lett.* **2023**, 34 (6), 108010. (b) Xu, L.; Huang, J.-F.; Chen, C.-C.; Qu, Q.; Shi, J.; Pan, M.; Li, Y.-M. Chemical synthesis of natural polyubiquitin chains through auxiliary-mediated ligation of an expressed ubiquitin isomer. *Org. Lett.* **2018**, 20 (2), 329-332.

(3) Xia, Q.; Meng, X. B.; Wang, Y.; Yuan, R. J.; Li, P. C.; Liu, L. W.; Li, Y.-M. A cell-permeable Ub-Dha probe for profiling E1–E2–E3 enzymes in live cells. *Chem. Comm.* **2024** 60, 4342-4345.

(4) Chen, Z.; Li, G.; Zhang, J.; Xu, X.; Yan, Q.; Wang, Q.; Zhang, Q.; Huang, J. Activity-Based Ubiquitin Probes Capture the Sulfenylated State of Deubiquitinases. *Angew. Chem. Int. Ed.* **2025**, 64 (43), e202512311.
